# Supplementary material for: Secretion of IFN-γ Associated with Galectin-9 Production by Pleural Fluid Cells from a Patient with Extrapulmonary Tuberculosis
Source: PubMed Central journal article supplement (PMC5535875; doi:10.3390/ijms18071382), 2017-06-28
Supplement: ijms-18-01382-s001.pdf [file ijms-18-01382-s001.pdf]

# Secretion of IFN- $\gamma$ Associated with Galectin-9 Production by Pleural Fluid Cells from a Patient with Extrapulmonary Tuberculosis

Jingge Zhao, Beata Shiratori, Haorile Chagan-Yasutan, Makoto Matsumoto, Toshiro Niki, Michinori Tanaka, Yayoi Takahashi, Osumu Usami, Yugo Ashino, and Toshio Hattori

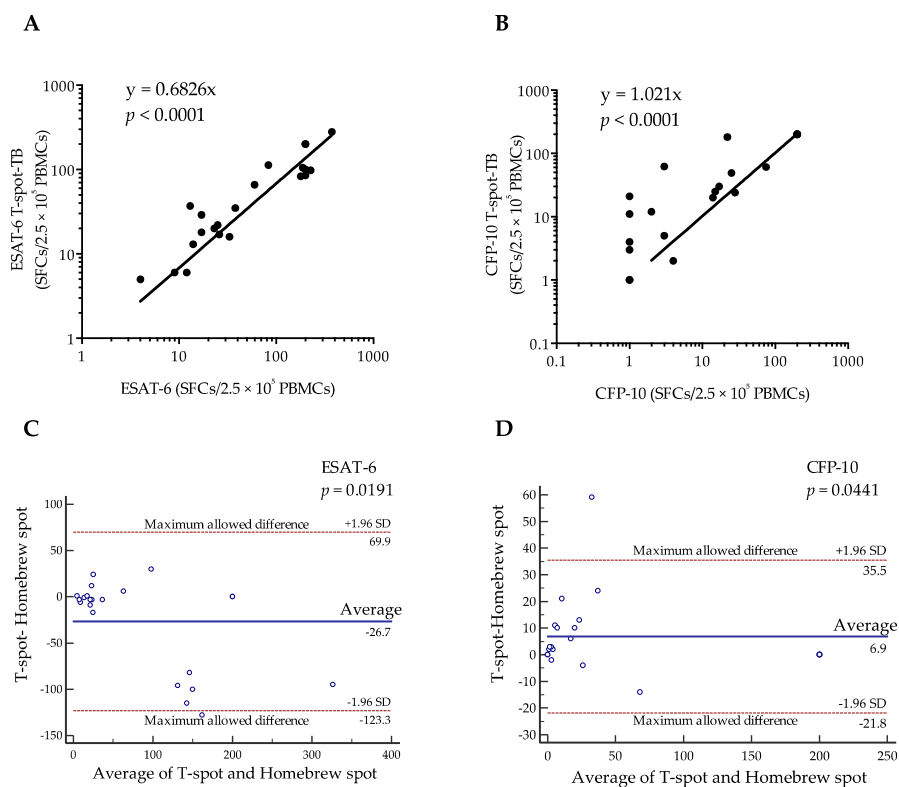

**Figure S1.** Comparison of ESAT-6 and CFP-10 peptides used in the study with commercially available antigens. (A, B) Linear regression between homebrew antigens-based and commercial T-spot antigen-based assay; (A) ESAT-6, (B) CFP-10. (C, D) The agreement between homebrew antigens-based and commercial T-spot antigen-based assay were analyzed by Bland-Altman plot method; (C) ESAT-6, (D) CFP-10.
